1 **SUMO/deSUMOylation of the BRI1 brassinosteroid receptor modulates plant**  
2 **growth responses to temperature**

3  
4 Maria Naranjo-Arcos<sup>1,#</sup>, Moumita Srivastava<sup>2,#</sup>, Mansi Bhardwarj<sup>2</sup>, Ari Sadanandom<sup>2\*</sup> and  
5 Grégory Vert<sup>1\*</sup>

6  
7 <sup>1</sup> Plant Science Research Laboratory (LRSV), UMR5546 CNRS/Université Toulouse 3/Toulouse-  
8 INP, 24 chemin de Borde Rouge, 31320 Auzeville Tolosane, France

9 <sup>2</sup> Department of Biosciences, Durham University, Stockton Road, Durham, DH1 3LE, United  
10 Kingdom

11  
12 # These authors contributed equally

13 \* For correspondence : [ari.sadanandom@durham.ac.uk](mailto:ari.sadanandom@durham.ac.uk); [Gregory.Vert@lrsv.ups-tlse.fr](mailto:Gregory.Vert@lrsv.ups-tlse.fr)

14  
15  
16 Classification : Biological Sciences, Plant Biology

17  
18 Keywords : Arabidopsis, Brassinosteroids, Receptor, BRI1, SUMO, temperature

19

20 **ABSTRACT**

21 Brassinosteroids (BRs) are a class of steroid molecules perceived at the cell surface that act as plant  
22 hormones. The BR receptor BRI1 offers a model to understand receptor-mediated signaling in  
23 plants and the role of post-translational modifications. Here we identify SUMOylation as a new  
24 modification, targeting BRI1 to regulate its activity. BRI1 is SUMOylated *in planta* on two lysine  
25 residues and the levels of BRI1-SUMO conjugates are controlled by the Desi3a SUMO protease.  
26 We demonstrate that BRI1 is deSUMOylated at elevated temperature by Desi3a, leading to  
27 increased BRI1 interaction with the negative regulator of BR signaling BIK1 and enhancing BRI1  
28 endocytosis. Loss of Desi3a or BIK1 results in increased response to temperature elevation,  
29 indicating that BRI1 deSUMOylation acts as a safety mechanism necessary to keep temperature  
30 responses in check. Altogether, our work establishes BRI1 deSUMOylation as a molecular  
31 crosstalk mechanism between temperature and BR signaling, allowing plants to translate  
32 environmental inputs into growth response.

33

34 **SIGNIFICANCE STATEMENT**

35 The brassinosteroid (BR) receptor BRI1 provides a paradigm for understanding receptor-mediated  
36 signaling in plants and contribution of post-translational modifications. Here, we show that BRI  
37 carries SUMO modifications in planta on two intracellular lysine residues and that temperature  
38 elevation triggers BRI1 deSUMOylation mediated by the Desi3a SUMO protease. Importantly,  
39 BRI1 deSUMOylation leads to downregulation of BR signaling via increased BRI1 interaction  
40 with the BIK1 negative regulator and increased BRI1 endocytosis. Loss of BRI1 deSUMOylation  
41 in *desi3a* mutants boosts plant responses to heat, indicating that BRI1 deSUMOylation acts as a  
42 brake to keep temperature responses in check. Our study uncovers a new post-translational

43 modification targeting BRI1 and sheds light on its functional outcome for environmentally-  
44 controlled plant growth.

45

## 46 **INTRODUCTION**

47 Brassinosteroids (BRs) are a class of plant hormones controlling various aspects of plant  
48 development and stress responses (1). Genetic, biochemical, and structural biology studies have  
49 revealed that BRs are perceived at the cell surface by the BRASSINOSTEROID INSENSITIVE1  
50 (BRI1) leucine-rich-repeat receptor-like kinase (LRR-RLK) (2-7). BR binding to BRI1 promotes  
51 its heterodimerization with the LRR-RLK BRI1-ASSOCIATED RECEPTOR KINASE (BAK1)  
52 (8, 9) to form a competent receptor complex. *cis* and *trans* phosphorylation of BRI1 and BAK1  
53 fully activates the receptor complex and initiates a protein phosphorylation-mediated signaling  
54 cascade, which ultimately regulates the activity of the BRASSINAZOLE RESISTANT(BZR)-  
55 family of transcription factors (10, 11). Among these, BZR1 and BES1 were shown to control the  
56 expression of thousands of BR-responsive genes important for plant growth and stress response  
57 (12, 13).

58 Inability to properly produce, sense or transduce the BR signal results in characteristic BR-  
59 deficient/insensitive phenotypes that include short hypocotyls in the dark, dwarf stature in the light,  
60 altered vascular development, prolonged vegetative phase, and reduced male fertility (5, 14-16). In  
61 contrast, BR overproduction or enhanced signaling activities are associated with increased growth  
62 (7). The precise control of BR perception at the cell surface is therefore crucial to ensure proper  
63 plant development and completion of the plant life cycle in an ever-changing environment. As the  
64 major BR receptor and a long-lived protein, BRI1 is regulated by several mechanisms to keep its  
65 basal activity in check and to desensitize BRI1 after BR signaling. The BRI1 kinase is first kept in  
66 its basal state by an autoinhibitory C-terminal tail (17). Phosphorylation of the C-terminal tail upon

67 BR binding likely releases autoinhibition for the full activation of BRI1. BRI1 also interacts with  
68 an inhibitory protein named BRI1 KINASE INHIBITOR1 (BKI1) that prevents interaction  
69 between BRI1 and BAK1 in resting cells (18). BR binding to BRI1 triggers BKI1 tyrosine  
70 phosphorylation and release in the cytosol, allowing the formation of an active BRI1-BAK1  
71 receptor complex (18, 19). Additional mechanisms were coopted to stop BRI1 from firing after  
72 perception of BRs and allow plant cells to go back to the resting state. Autophosphorylation of  
73 residue S891 in the G-loop occurs late after BR perception and deactivates BRI1 via inhibiting its  
74 ATP binding (20). BRI1 is also subjected to internalization from the cell surface and vacuolar  
75 degradation using several mechanisms. First, the KINASE-ASSOCIATED PROTEIN  
76 PHOSPHATASE (KAPP) was proposed to regulate BRI1 through interaction between its  
77 forkhead-associated (FHA) domain and BRI1's cytoplasmic domain (21). KAPP also co-localizes  
78 with the BAK1-related coreceptor SOMATIC EMBRYOGENESIS RECEPTOR KINASE1  
79 (SERK1) at the plasma membrane and interacts with SERK1 in endosomes suggesting that KAPP-  
80 mediated dephosphorylation of BRI1 and SERK1 downregulates BR signaling (22). Second, BRI1  
81 degradation was shown to require PROTEIN PHOSPHATASE2A (PP2A)-mediated  
82 dephosphorylation triggered by methylation of the PP2A using a leucine  
83 carboxylmethyltransferase (23). Most importantly, BRI1 undergoes endocytosis and degradation  
84 in the vacuole (24). This is controlled by lysine(K)-63 linked polyubiquitin chain conjugation to  
85 BRI1 intracellular domain driven by the PLANT U-BOX12 (PUB12) and PUB13 E3 ligases (25,  
86 26). BRI1 ubiquitination promotes BRI1 internalization from the cell surface and is essential for  
87 proper sorting in endosomes and vacuolar targeting (25). BRI1 endocytosis was initially thought  
88 to be independent of ligand binding (24). However, the fact that BRI1 ubiquitination is dependent  
89 on both BRI1 kinase activity and ligand perception suggests that BRI1 internalization and vacuolar  
90 degradation is regulated by BRs (25, 26). BRI1 endocytosis is also under the control of

91 environmental signals that impinge on growth via BR responses. Elevation of ambient growth  
92 temperature decrease BRI1 protein accumulation to boost heat-driven root elongation (27). The  
93 crosstalk between BR signaling and temperature responses likely uses BRI1 ubiquitination as the  
94 expression of an ubiquitination-defective BRI1 variant lacking 25 lysine residues in BRI1  
95 intracellular domain abolishes BRI1 degradation upon warmth (27).  
96 BRI1 serves as the archetypal plant receptor protein in the study of PTMs and their interplay, and  
97 their role in signaling/signal integration. Here show that BRI1 is SUMOylated and that BRI1-  
98 SUMO conjugates are regulated by the Desi3a SUMO protease. Most importantly, we uncover that  
99 BRI1 SUMOylation drops following growth at heightened temperatures, leading to increased BRI1  
100 interaction with the negative regulator BIK1 and increased BRI1 endocytosis to attenuate BR-  
101 dependent growth. Finally, we demonstrate that such downregulation in BR signaling is required  
102 to restrict heat-induced growth responses. Overall, our work shed light on a new PTM targeting  
103 BRI1 and highlights its interplay with BRI1 ubiquitin-mediated endocytosis in the control of  
104 environmentally-regulated plant growth.

105

## 106 **RESULTS**

### 107 **BRI1 is decorated with SUMO modifications *in planta***

108 BRI1 was previously demonstrated to be modified by ubiquitination on intracellular lysine residues  
109 (25). Ubiquitin is the founding member of a class of PTMs named Ubiquitin-Like modifiers  
110 (UBLs) that share a core  $\beta$ -grasp fold of approximately 70 amino acids and that can be reversibly  
111 attached to proteins or other cellular constituents lipids to regulate their activity (28). To evaluate  
112 if BRI1 is modified by other ubiquitin-like modifications, we first sought to monitor if the BRI1 is  
113 SUMOylated *in planta*. Transgenic plants expressing a functional BRI1 fusion to the mCitrine

114 yellow fluorescent protein (mCit) under the control of *BRI1* promoter were used to  
115 immunoprecipitate BRI1-mCit protein with micromagnetic beads coupled to anti-GFP antibodies.  
116 Probing BRI1-mCit immunoprecipitates with anti-SUMO1 (AtSUMO1) revealed a SUMO specific  
117 signal at the size of BRI1-mCit, similar to what is observed for the positive controls JAZ6-GFP  
118 (29) (Figure 1A) or FLS2-GFP (Figure S1A) (30). This indicates that BRI1 is conjugated with  
119 SUMO1 under standard growth conditions. In contrast to the smear-like signals obtained for BRI1  
120 with anti-Ub antibodies (25, 26), the SUMO1-specific signal associated to BRI1 migrated as a  
121 sharp band close to the molecular weight of BRI1 indicating that BRI1 carries a very limited  
122 number of SUMO modifications.

123 To gain further insight into BRI1 SUMOylation, we searched for possible SUMO sites in BRI1 as  
124 previously done with FLS2 (30). We identified lysine residues K1066 and K1118 in the BRI1  
125 kinase domain as putative SUMO sites. Residue K1066 is strictly conserved in Arabidopsis BRI1-  
126 like proteins and more generally in plant BRI1 homologs (Figure S1B). A conserved lysine is also  
127 found in a close context to K1118 in Arabidopsis BRLs and plant BRI1 homologs. To decipher if  
128 both lysine residues are actual targets of SUMO *in planta*, we generated the K1066R and K1118R  
129 BRI1 variants where the corresponding lysine have been substituted to arginine to maintain the  
130 positive charge while preventing SUMOylation. Mutation of any of the two lysine residues in BRI1  
131 decreased SUMO conjugation compared to wild-type BRI1 when transiently expressed in  
132 *Nicotiana benthamiana* (Figure S1C), suggesting that these are *bona fide* SUMO sites. Mutation  
133 of both lysine residues completely abolished BRI1 SUMOylation (Figure 1B), indicating that these  
134 are the only SUMO sites in BRI1. Mutation of K1066 and K1118 however did not alter  
135 significantly the overall ubiquitination pattern of BRI1 (Figure 1B). This observation is consistent  
136 with the fact that BRI1 is heavily ubiquitinated *in planta* and that mutation of 25 lysine residues in  
137 BRI1 intracellular domain, including K1066 and K1118, is required to completely abolish BRI1

138 ubiquitination (25). Altogether, our work reveals that BRI1 can be post-translationally modified at  
139 residues K1066 and K1118 by either ubiquitin or SUMO.

140

### 141 **BRI1 SUMOylation is regulated by the SUMO protease Desi3a**

142 The levels of SUMO-conjugates of another plant plasma membrane protein, FLS2, are controlled  
143 by the balance between the SUMO E2-conjugating enzyme SCE1, which is capable of directly  
144 transferring SUMO onto target residues (31), and the Desi3a SUMO protease that deSUMOylates  
145 FLS2 (30). Desi3a has been shown to be degraded upon flagellin perception, allowing the  
146 accumulation of SUMO-FLS2 conjugates and triggering intracellular immune signaling. To  
147 examine if Desi3a also controls the levels of SUMO-BRI1, we first determined whether Desi3a is  
148 found in overlapping expression territories with BRI1. Publicly available genome-wide expression  
149 data reveals that *Desi3a* has a broad expression profile overlapping with *BRI1*. We confirmed these  
150 observations by RT-PCR using RNA extracted from various Arabidopsis tissues (Figure S2). We  
151 next addressed whether Desi3a protein co-localizes with BRI1 at the plasma membrane. Transient  
152 expression of a Desi3a-mCherry (Desi3a-mCh) fusion protein in *N. benthamiana* confirmed the  
153 presence of Desi3a at the cell surface (Figure 2A). A similar pattern was observed with the BRI1-  
154 mCit of FLS2-GFP functional fusions. In addition, a clear colocalization at the cell surface is  
155 observed between Desi3a and BRI1 or FLS2 (Manders coefficient  $M_{BRI1}=0.83$  and  $M_{FLS2}=0.80$ ),  
156 to the resolution of the confocal microscope. The fluorescence profile of Desi3a-mCh clearly  
157 overlapped with BRI1-mCit at the plasma membrane, similarly to what is observed for FLS2-GFP  
158 (Figure S3) (30). We next tested whether the Desi3a SUMO protease had the ability to interact  
159 with BRI1. To this purpose, we took advantage of the transient expression in *N. benthamiana* since  
160 BRI1 is SUMOylated in this experimental system. BRI1-mCit was transiently expressed together  
161 with Desi3a-HA and subjected to immunoprecipitation using GFP beads. Probing BRI1-mCit

162 immunoprecipitates with anti-HA antibodies revealed the presence of Desi3a-HA (Figure 2B).  
163 Expression of GFP alone with Desi3a was used as a negative control and failed to capture any  
164 interaction (Figure 2B), indicating that BRI1 interacts *in vivo* with Desi3a. Furthermore, we used  
165 the ULP1a SUMO protease that deSUMOylates the BZR1 transcription factor (32) and observed  
166 no interaction with BRI1 (Figure 2B).

167 Altogether, this indicates that BRI1 specifically interacts with the plasma membrane-localized  
168 Desi3a SUMO protease and that the SUMOylation status of BRI1 is controlled by the Desi3a  
169 SUMO protease.

170

### 171 **Temperature elevation regulates BRI1 deSUMOylation**

172 To shed light on the biological relevance of BRI1 SUMOylation, we searched for possible  
173 stimuli/conditions increasing or decreasing the accumulation of BRI1 SUMO conjugates. Among  
174 conditions tested, we focused our attention on the role of ambient temperature elevation since  
175 previously reported to post-translationally regulate BRI1 (27). Plants expressing BRI1-mCit were  
176 grown at 21°C or 26°C, as previously done (27), before immunoprecipitation of BRI1-mCit.  
177 Immunoprecipitates were normalized to show equivalent BRI1-mCit signals, as visualized using  
178 anti-GFP antibodies (Figure 3A), before being probed with anti-SUMO1 antibodies to detect the  
179 SUMOylated pool of BRI1 at both temperatures. Plants grown at 21°C or 26°C clearly showed  
180 different accumulation of BRI1 SUMO conjugates. Notably, temperature elevation was  
181 accompanied with lower SUMOylated BRI1 (Figure 3A). Quantification of the BRI1-SUMO  
182 signals obtained, relative to the levels of immunoprecipitated BRI1 revealed a 7-fold decrease at  
183 elevated temperature (Figure 3B). Such a drop in BRI1-SUMO levels at higher temperature may  
184 be a direct consequence of increased Desi3a levels. To test this, we first investigated the influence  
185 of temperature on the accumulation of BRI1 and Desi3a proteins using transient expression in *N.*



186 *benthamiana*. Plants agroinfiltrated with BRI1-mCit and Desi3a-mCh were exposed to either 21°C  
187 or 26°C for 2 days and imaged at the confocal microscope. Several independent experiments were  
188 carried out and multiple regions of interest analyzed to overcome the variability in transformation  
189 efficiency. Overall, temperature elevation reproducibly decreased BRI1-mCit accumulation when  
190 co-expressed with Desi3a-mCh (Figure 3C, 3D), reminiscent of the effect of heat on BRI1  
191 accumulation previously observed in *Arabidopsis* roots (27). This was also accompanied by an  
192 increase in the fluorescence associated with Desi3a (Figure 3C, 3D). The impact of temperature  
193 elevation was confirmed using transgenic *Arabidopsis* plants constitutively expressing a Desi3a-  
194 HA fusion protein. Heat promoted the accumulation of Desi3a-HA protein as observed by western  
195 blot (Figure 3E, F), pointing to a post-transcriptional regulation of Desi3a by temperature. We then  
196 addressed how temperature affects the ability of BRI1 and Desi3a to interact *in vivo*.  
197 Agroinfiltrated plants exposed to 26°C reproducibly harbored lower BRI1-mCit accumulation  
198 (Figure 3G), consistent with our confocal microscopy observations. BRI1 immunoprecipitates  
199 however showed increased Desi3a-HA proteins levels at 26°C, pointing to the increased interaction  
200 between BRI1 and Desi3a when plant experience heightened temperature (Figure 3G). Taken  
201 together, these observations indicate that the increased accumulation of Desi3a and stronger  
202 interaction between BRI1 likely explains the drop in BRI1 SUMOylation observed at 26°C.

203

#### 204 **Desi3a-mediated deSUMOylation of BRI1 controls temperature responses**

205 Plant responses to temperature are highly dependent on other environmental factors such as light  
206 (27, 33). We therefore assessed the genetic contribution of BR signaling to plant responses to  
207 elevated temperature in our conditions by scoring hypocotyl length of wild-type, *bri1*, and the *bes1*-  
208 *D* constitutive BR response mutant at 21°C or 26°C. Wild-type seedlings grown at elevated  
209 temperature elongated their hypocotyls (Figure S4A, S4B, S4C). *bes1-D* showed much greater

210 responses to heat than wild-type while *bri1* failed to respond (Figure S4A, S4B, S4C), suggesting  
211 that BR signaling positively impinges on plant temperature responses in hypocotyls. We next  
212 investigated the role of SUMO/deSUMOylation upon warmth by comparing hypocotyl length of  
213 wild-type, and *desi3a* at 21°C or 26°C. *desi3a* mutants showed slightly shorter hypocotyls at 21°C  
214 compared to wild-type seedlings, but elongated more at 26°C (Figure 4A). This increased response  
215 to temperature is clearly highlighted by the elevated ratio of hypocotyl length at 26°C/21°C for  
216 *desi3a* (Figure 4B). This suggests that Desi3a is a negative regulator of temperature responses or  
217 that conversely, SUMOylation is required to promote hypocotyl elongation upon heat. We next  
218 monitored the phosphorylation status of the BR pathway downstream transcription factor BR  
219 BES1. BES1 exists under a phosphorylated form (P-BES1) and dephosphorylated form (BES1),  
220 and exogenous BR application promotes the conversion of P-BES1 into its unphosphorylated active  
221 BES1 form (11). Compared to wild-type plants, *desi3a* showed a mild increase in dephosphorylated  
222 BES1:phosphorylated BES1 ratio levels (Figure 4C, 4D), indicating that *desi3a* harbors enhanced  
223 BR signaling. This observation is consistent with *bes1-D* greatly over-responding to high  
224 temperature (Figure S4A, S4B, S4C).

225 Next, we sought to decipher the specific role of BRI1 SUMO/deSUMOylation in plant responses  
226 to elevated temperature and the underlying mechanism(s) by genetically impacting on BRI1  
227 SUMOylation. We reasoned that generating transgenic plants expressing the non-SUMOylated  
228 BRI1<sub>2KR</sub> version would prevent us from reaching any solid conclusion on the role of BRI1  
229 SUMO/deSUMOylation since K1066 and K1118 are also ubiquitin targets. Mutating both lysine  
230 residues would indeed directly abolish ubiquitination and SUMOylation at these sites, and possibly  
231 other lysine-based post-translational modifications. We decided instead to characterize deeper the  
232 impact of altered BRI1-SUMO levels at residues K1066 and K1118 using the *desi3a* mutant  
233 background. This offers the great advantage to grasp the interplay between both post-translational

234 modifications at K1066 and K1118. We therefore crossed the *desi3a* T-DNA knock-out mutant  
235 with the BRI1-mCit reporter line and isolated *desi3a*/BRI1-mCit double homozygous plants. These  
236 plants were imaged at the confocal microscope to observe any possible change in BRI1 distribution  
237 in the cell. No obvious change in BRI1 distribution between the plasma membrane in endosomes  
238 of BRI1-mCit or *desi3a*/BRI1-mCit lines. To better investigate the possible effect of BRI1 SUMO  
239 on BRI1 dynamics, we then took advantage of the fungal toxin Brefeldin A (BFA) that inhibits  
240 endosomal trafficking in Arabidopsis roots and hypocotyls (34, 35), and thus creates large  
241 aggregates of *trans*-Golgi network/early endosomal compartments. Endocytosed BRI1-mCit was  
242 found in BFA bodies when plants were challenged with BFA in the presence of the translation  
243 inhibitor cycloheximide (CHX) (Figure 5A), similar to roots (24, 25, 36). However, quantification  
244 of several parameters pointed to a reduction in BRI1 endocytosis in the *desi3a* mutant compared  
245 to wild-type plants. First, the ratio of plasma membrane over intracellular BFA-trapped BRI1-mCit  
246 fluorescence is increased in *desi3a* compared to the wild-type background (Figure 5B). Second,  
247 loss of Desi3a is accompanied with a reduction in the number of BFA bodies per cell (Figure 5C).  
248 Taken together, these observations indicate the loss of Desi3a and SUMOylation at residues K1066  
249 and K1118 directly or indirectly decreased the endocytic flux of BRI1.

250

### 251 **BIK1 is recruited to deSUMOylated BRI1 to dampen temperature responses**

252 Lack of SUMOylation renders FLS2 unable to mount proper immune responses due to the  
253 increased interaction with the downstream receptor-like cytoplasmic kinase (RLCK) BIK1 (30),  
254 which acts as a positive regulator of FLS2-mediated signaling (37). BIK1 is also known to  
255 participate to BR signaling, although as negative regulator, where it is associated with BRI1 in  
256 resting cells and is released from the BRI1-BAK1 receptor complex upon BR perception (38). To  
257 shed light on the direct functional consequences of BRI1 SUMO/deSUMOylation, we therefore

258 investigated if BRI1 SUMOylation affects the BRI1-BIK1 interaction using transient expression  
259 in *N. benthamiana*. Immunoprecipitation of BIK1-HA using HA beads followed by probing with  
260 anti-GFP antibodies failed to detect any interaction with free GFP (Figure 6A). In contrast, BIK1-  
261 HA was able to interact with BRI1-mCit (Figure 6A), consistent with previous reports (38).  
262 Strikingly, BIK1-HA showed a much stronger interaction with the SUMO-defective BRI1<sub>2KR</sub>  
263 (Figure 6A). Considering that BRI1 SUMO levels are lower at 26°C, we sought to determine the  
264 influence of temperature elevation on the BRI1-BIK1 interaction. BRI1 immunoprecipitates  
265 recovered higher BIK1 protein levels at 26°C compared to 21°C (Figure 6B), consistent with the  
266 fact that BIK1 shows stronger interaction with the non-SUMOylatable BRI1<sub>2KR</sub> variant. This  
267 evidence indicates that, similarly to what was observed for FLS2 (30), SUMOylation reduces the  
268 interaction of BRI1 with the downstream kinase BIK1. Genetically, BIK1 negatively regulates BR  
269 signaling, with *bik1* mutant showing increased BR responses even upon high concentration of the  
270 BRZ BR biosynthetic inhibitor (38). To further illustrate the contribution of BRI1 SUMOylation  
271 to temperature responses and determine the possible role of BIK1 in this process, we phenotyped  
272 the previously published *bik1* loss-of-function mutant at 21°C and 26°C. In contrast to the mild  
273 increase in hypocotyl length observed in wild-type seedlings, *bik1* hypocotyls dramatically  
274 elongated in response to heat (Figure 6C, 6D, 6E). These observations point to the role of BIK1 as  
275 negative regulator of temperature responses, similarly to Desi3a.

276

## 277 **DISCUSSION**

278 The BR receptor BRI1 serves as a model to grasp the intricate mechanisms of RLK-mediated  
279 signaling in plants (39). The activity of BRI1 is regulated by post-translational modifications  
280 required to initiate, amplify or dampen BR signaling. Phosphorylation between BRI1, the SERK  
281 coreceptors, and different downstream receptor-like cytoplasmic kinases mostly activates BR

282 signaling (39), while ubiquitination leads to BRI1 degradation and signal attenuation (25, 26).  
283 Several endogenous and exogenous cues also converge at the level of BRI1 protein to influence  
284 BR-dependent growth. For example, glucose was shown to increase BRI1 endocytosis to control,  
285 in part, changes in root architecture associated with fluctuations in light intensity and  
286 photosynthetic activity (40). Similarly, elevation of ambient temperature impinges on BR-  
287 dependent root growth by triggering BRI1 destabilization (27). We show here that BRI1 is  
288 subjected to SUMO/deSUMOylation and that this is also required to control plant responses to  
289 heat. BRI1 is decorated with SUMO under standard conditions, and deSUMOylated by the *Desi3a*  
290 SUMO protease when plants are grown at warm temperature (Figure S5). *Desi3a*-mediated BRI1  
291 deSUMOylation favors BRI1 interaction with the negative regulator of BR signaling BIK1 and  
292 also promotes BRI1 endocytosis. *desi3a* and *bik1* mutants both overrespond to heightened  
293 temperature, indicating that both *Desi3a* and BIK1 act as negative regulators of temperature  
294 responses. Thus, our work highlights a new mechanism to integrate temperature input into BR-  
295 dependent growth responses.

296 The major driver of the elongation observed when plants face heat is the phytohormone auxin (41).  
297 Temperature elevation reduces PHYTOCHROME B activity and induces *PHYTOCHROME*  
298 *INTERACTING FACTOR4 (PIF4)* expression to increase auxin biosynthesis (42-49). PIF4, as well  
299 as other PIFs, directly binds to the promoters of auxin biosynthesis genes, such as *YUCCA8 (YUC8)*  
300 and *YUC9*, *TRYPTOPHAN AMINOTRANSFERASE OF ARABIDOPSIS1 (TAA1)* and  
301 *CYTOCHROME P450 FAMILY79B (CYP79B2)* to increase auxin-responsive gene expression and  
302 tissue elongation (42, 43, 45, 47-50). BRs were also reported to participate to heat response in both  
303 aerial and underground tissues, although their contribution is opposite in both organs where BRs  
304 are known to differentially regulate growth (14, 51). BZR1 binds to the promoter of *PIF4* at  
305 elevated temperature to increase its expression and amplify shoot transcriptional responses to heat

306 and promotes hypocotyl elongation (52). In roots, heat promotes BRI1 destabilization to  
307 downregulate BR signaling and to stimulate root elongation (27). Our findings now shed light on  
308 another level of control of BR signaling by temperature in aerial parts, with heat promoting BIK1  
309 recruitment to the BR receptor complex and decreasing BRI1 levels through Desi3a-mediated BRI1  
310 deSUMOylation (Fig. S5). This new layer of integration between BR signaling and warmth  
311 negatively regulates temperature responses, as loss of Desi3a or BIK1 yields increased heat-  
312 induced hypocotyl elongation. Auxin and BRs are well-known to act synergistically to promote  
313 cell elongation (53). The SUMO-dependent regulation of BRI1 we have uncovered likely allows  
314 plants to dampen BR signaling and to balance the synergistic effect between auxin and BRs on the  
315 transcription of growth-promoting genes, thus preventing plants from over-elongating upon  
316 warmth. The precise molecular mechanisms underlying this new regulatory level are still unclear.  
317 SUMOylation may have a direct inhibitory role on BRI1 endocytosis so that Desi3a-triggered BRI1  
318 deSUMOylation at 26°C increases internalization of BRI1. There are few reports describing a role  
319 for SUMO in inhibiting endocytosis. For example, SUMOylation of the TRPM4 Ca<sup>2+</sup>-activated  
320 nonselective cation channel impairs TRPM4 endocytosis and leads to elevated TRANSIENT  
321 RECEPTOR POTENTIAL CATION CHANNEL SUBFAMILY M4 (TRPM4) density at the cell  
322 surface (54). Alternatively, SUMO/deSUMOylation of BRI1 may indirectly impact on BRI1  
323 dynamics *via* the interplay between SUMO and Ub in the control of BRI1 endocytosis. BRI1  
324 internalization from the cell surface is driven by massive ubiquitination decorating many cytosol-  
325 exposed lysine residues through the PUB12 and PUB13 E3 Ub ligases (25, 26). Additionally, heat  
326 was shown in roots to destabilize BRI1 in an ubiquitin-dependent manner (27). Similarly to Ub,  
327 SUMO is covalently attached to proteins using lysine indicating that SUMO modifications  
328 potentially compete with Ub for the same sites to alter protein functions (55). During NF-κB  
329 activation for example, IκBα is ubiquitinated and degraded to release its inhibition of NF-κB (56).

330 In contrast, SUMOylation at the same site prevents ubiquitination and turnover of I $\kappa$ B $\alpha$  (57),  
331 therefore inhibiting NF- $\kappa$ B activation. BRI1 SUMOylation at residues K1066 and K1118 may  
332 therefore limit its ubiquitination at standard growth temperature. The deSUMOylation of BRI1  
333 observed at elevated temperature and driven by Desi3a would free additional lysine residues for  
334 ubiquitination, thus boosting Ub-mediated endocytosis of BRI1. No significant difference in the  
335 Ub profile of BRI1 could however be observed in the SUMO-defective BRI1<sub>2KR</sub> form. The  
336 presence of many target lysines for Ub in BRI1 yields a large high molecular weight BRI1-Ub  
337 smear that likely masks the effect of lack of ubiquitination at K1066 and K1118 in BRI1<sub>2KR</sub>.  
338 Consistently, the mutation of a single Ub target lysine in BRI1 identified by proteomics had no  
339 significant impact of the overall Ub profile of BRI1 (25). Considering the prominent role of Ub in  
340 endocytosis of plasma membrane proteins, we propose that heat-regulated SUMO/deSUMOylation  
341 of BRI1 allows plant to fine tune BRI1 Ub-mediated endocytosis and BR signaling (Fig. S5).  
342 Whether PUB12 and PUB13 are responsible for the linkage of additional Ub chains to  
343 deSUMOylated BRI1 upon heat or whether a yet to be characterized temperature-regulated E3 Ub  
344 ligase is involved will have to be tackled in the future.

345 The FLS2 LRR-RLK flagellin receptor shows increased SUMOylation upon flagellin perception  
346 mediated by Desi3a degradation, thus releasing BIK1 from FLS2 (30). BIK1 being a positive  
347 regulator of FLS2 signaling, FLS2-SUMO conjugates positively regulate downstream innate  
348 immune signaling (30, 37). BRI1 and FLS2 are often compared since both representing model for  
349 the large plant LRR-RLK family. Despite their radically different biological outputs, BRI1- and  
350 FLS2-mediated signaling pathways share striking parallels. Both receptors predominantly localize  
351 at the plasma membrane where they bind their respective ligands and fire (58, 59). BRI1 and FLS2  
352 both use the same subset of co-receptors to initiate signaling (8, 9, 60, 61). Structural and  
353 biochemical studies revealed that BRs and the flg22 flagellin peptide both act as molecular glue to

354 form or stabilize signaling-competent receptor complexes (3, 6, 62). In both cases, ligand binding  
355 triggers *cis*- and *trans*-phosphorylation events within the receptor complexes to reach full  
356 activation (63, 64). Downstream of the receptor complexes are found RLCKs that are direct  
357 substrates of the receptor complexes (65). In particular, the RLCK BIK1 is shared between both  
358 pathways but is a positive regulator for immune responses and a negative regulator for BR signaling  
359 (37, 38, 66). BIK1 has been shown to negatively regulate BR signaling through direct association  
360 with BRI1 (38). After BR perception, BIK1 is phosphorylated by BRI1, causing its dissociation  
361 from the receptor. The precise function of BIK1 in BR signaling is therefore still unclear.  
362 Regardless, the Desi3a- and SUMO-regulated interaction of BIK1 with BRI1 and FLS2 now  
363 emerges as a possible common regulatory mechanisms of ligand-binding LRR-RLs and  
364 corresponding signaling pathways. Although BRI1 and FLS2 have been shown to be confined to  
365 different nanodomains at the plasma membrane and the corresponding pathways to use different  
366 phosphocode in early phases (67), how signaling specificity is maintained along both pathways  
367 that rely on several shared components will deserve more attention in the future.

368

## 369 **MATERIAL & METHODS**

### 370 **Plant material and growth conditions**

371 The genotypes used in this study are wild-type (Col0), *bri1* T-DNA knockout (GABI\_134E10)  
372 (19), Desi3a-HA (30), *desi3a-1* T-DNA knockout (SALK\_151016C) (30), *bik1* T-DNA knock-out  
373 (SALK\_005291) (37), *bes1-D* (11), FLS2::FLS2-GFP (30) and 35S::JAZ6-GFP (29). BRI1<sub>K1066R</sub>,  
374 BRI1<sub>K1118R</sub> and the BRI1<sub>2KR</sub> variant carrying the K1066R and K1118R substitutions were  
375 generated by site-directed mutagenesis of the pDONR221-BRI1 (19) using the primers listed  
376 (Table S1). Final destination vectors obtained by recombination using the pB7m34GW destination



377 vectors (68), and the entry vectors pDONRP4P1r-BRI1prom (19), pDONR221-BRI1 or mutated  
378 BRI1 versions, and pDONRP2rP3-mCitrine (19).

379 After seed sterilisation and stratification, seeds were placed for germination on solid agar plates  
380 containing half-strength Linsmaier and Skoog medium without sucrose. They were grown  
381 vertically in growth chambers under long-day conditions (16 h light/8 h dark,  $90 \mu\text{E m}^{-2}\cdot\text{s}^{-1}$ ) at 21°C  
382 or 26°C. For the specific growth conditions, refer to figure legends.

383 Infiltration of *N. benthamiana* leaves was performed using standard procedures and used the binary  
384 vectors carrying BRI1::BRI1-mCit (19), 35S::Desi3a-mCh and FLS2::FLS2-GFP (30).

385

### 386 **Chemical treatments**

387 The final concentrations of the chemicals are indicated in the figure legends. The chemical stock  
388 solutions are in the following concentration: 100 mM cycloheximide (Sigma) in EtOH, 10 mM  
389 BFA (Sigma) in DMSO.

390

### 391 **Hypocotyl measurements**

392 Seeds were sterilised and stratified for four-days. For dark-grown hypocotyl measurements, seeds  
393 were exposed to the light for 6h and then placed in dark at 21°C or 26°C for 3 days. For light-  
394 grown hypocotyl measurements, seeds were directly exposed to light at 21°C or 26°C for 6 days.  
395 Plates were scanned and hypocotyls measured using Fiji imageJ software. The mean and standard  
396 error to the mean (SEM) were calculated by combining the three replicates.

397

### 398 **Immunoprecipitation and western Blot analysis**

399 For detection of proteins from crude extracts, total proteins were extracted from ~50 mg plant  
400 material using Laemmli extraction buffer, using a 1:3 w/v ratio between tissue powder and  
401 extraction buffer. After debris elimination, proteins were separated by SDS-PAGE. Protein  
402 detection was carried out using peroxidase-coupled anti-HA-Peroxidase antibodies (Roche,  
403 dilution 1/4000), peroxidase-coupled anti-GFP antibodies (Milteneyi, dilution 1/5000), anti-  
404 SUMO1 antibodies (69), anti-BES1 antibodies (11), anti-FBPase (Agrisera, dilution 1/5000). To  
405 quantify the ratio between BES1 and P-BES1, signal intensity obtained with anti-BES1 antibodies  
406 and corresponding to BES1 and P-BES1 was determined using Image J. Western blot analyses  
407 were performed in triplicates. Representative blots are shown in figures. For the loading control  
408 using anti-FBPase antibodies, the same membranes were stripped and used.

409 Immunoprecipitation experiments were carried out as previously described (25), using the  $\mu$ MACS  
410 GFP and HA isolation kits (Miltenyi Biotec). Input and immunoprecipitated fractions were  
411 separated by SDS-PAGE and subjected to western blot analyses as described above.

412

### 413 **Confocal microscopy**

414 Dark-grown hypocotyls were treated with 100  $\mu$ M CHX and 50  $\mu$ M BFA for 15 min under vacuum  
415 before transfer to the corresponding temperatures prior to imaging. Hypocotyls were mounted in  
416 the same solution and imaged on a Leica TCS SP2 SP8 confocal laser scanning microscopes  
417 ([www.leica-microsystems.com](http://www.leica-microsystems.com)). The 514-nm laser line was used to image BRI1-mCit. Laser  
418 intensity and detection settings were kept constant in individual sets of experiments to allow the  
419 direct comparison of fluorescence levels. To image entire hypocotyl cells, the TileScan and Z-stack  
420 option was used. Due to the length of hypocotyl cells, the fluorescence intensity of the total plasma  
421 membrane (PM) was not possible. Rather, the intensity of different region of interest of equivalent

422 size and corresponding to the plasma membrane was measured. The PM/BFA body ratio  
423 corresponds to the mean fluorescence of the PM portions and the mean fluorescence of BFA bodies.  
424 For localization and colocalization of transiently expressed proteins in *N. benthamiana*, the 488,  
425 514, 561 nm laser line were used to image FLS2-GFP, BRI1-mCit and Desi3a-mCh, respectively.  
426 Colocalization analyses and determination of the Manders' coefficient, highlighting the fraction of  
427 GFP/mCit signals colocalizing with mCh, were carried out using the ImageJ plugin JACoP (70).

428

### 429 **Statistical analyses**

430 Data are shown as the average of three individual biological replicates, unless stated otherwise.  
431 Statistical analyses were performed with the software GraphPad Prism 7 software. Statistical  
432 significance of hypocotyl length between genotypes and/or conditions was assessed using one-way  
433 analysis of variance with post hoc Tukey test. Experiments had at least n=20 seedlings in each  
434 biological replicate. Quantification of western blots used the non-parametric Mann-Whitney (two  
435 genotypes/conditions) or Kruskal-Wallis (three genotypes/conditions and more) tests. Statistical  
436 significance is defined as follow : \*,  $P \leq 0.05$  ; \*\*,  $P \leq 0.01$ ; \*\*\*,  $P \leq 0.001$ .

437

### 438 **Acknowledgements**

439 We thank Cyril Zipfel and Yanhai Yin for sharing *bik1* mutant and anti-BES1 antibodies,  
440 respectively. We would also like to acknowledge the Imaging facility from the Fédération de  
441 Recherche Agrobiosciences Interactions et Biodiversité of Toulouse (FRAIB). This work was  
442 supported by research grants from the French National Research Agency (ANR-17-CE20-0026-01  
443 to G.V.) and the French Laboratory of Excellence (project "TULIP" grant nos. ANR-10-LABX-  
444 41 and ANR-11-IDEX-0002-02 to G.V.).

445

446

## 447 **References**

- 448 1. Clouse SD (2011) Brassinosteroid signal transduction: from receptor kinase activation to  
449 transcriptional networks regulating plant development. *Plant Cell* 23(4):1219-1230.
- 450 2. He Z, *et al.* (2000) Perception of brassinosteroids by the extracellular domain of the receptor  
451 kinase BRI1. *Science* 288(5475):2360-2363.
- 452 3. Hothorn M, *et al.* (2011) Structural basis of steroid hormone perception by the receptor kinase  
453 BRI1. *Nature* 474(7352):467-471.
- 454 4. Kinoshita T, *et al.* (2005) Binding of brassinosteroids to the extracellular domain of plant receptor  
455 kinase BRI1. *Nature* 433(7022):167-171.
- 456 5. Li J & Chory J (1997) A putative leucine-rich repeat receptor kinase involved in brassinosteroid  
457 signal transduction. *Cell* 90(5):929-938.
- 458 6. She J, *et al.* (2011) Structural insight into brassinosteroid perception by BRI1. *Nature*  
459 474(7352):472-476.
- 460 7. Wang ZY, Seto H, Fujioka S, Yoshida S, & Chory J (2001) BRI1 is a critical component of a plasma-  
461 membrane receptor for plant steroids. *Nature* 410(6826):380-383.
- 462 8. Li J, *et al.* (2002) BAK1, an Arabidopsis LRR receptor-like protein kinase, interacts with BRI1 and  
463 modulates brassinosteroid signaling. *Cell* 110(2):213-222.
- 464 9. Nam KH & Li J (2002) BRI1/BAK1, a receptor kinase pair mediating brassinosteroid signaling. *Cell*  
465 110(2):203-212.
- 466 10. Wang ZY, *et al.* (2002) Nuclear-localized BZR1 mediates brassinosteroid-induced growth and  
467 feedback suppression of brassinosteroid biosynthesis. *Dev Cell* 2(4):505-513.
- 468 11. Yin Y, *et al.* (2002) BES1 accumulates in the nucleus in response to brassinosteroids to regulate  
469 gene expression and promote stem elongation. *Cell* 109(2):181-191.
- 470 12. Sun Y, *et al.* (2010) Integration of brassinosteroid signal transduction with the transcription  
471 network for plant growth regulation in Arabidopsis. *Dev Cell* 19(5):765-777.
- 472 13. Yu X, *et al.* (2011) A brassinosteroid transcriptional network revealed by genome-wide  
473 identification of BES1 target genes in Arabidopsis thaliana. *Plant J* 65(4):634-646.
- 474 14. Clouse SD, Langford M, & McMorris TC (1996) A brassinosteroid-insensitive mutant in Arabidopsis  
475 thaliana exhibits multiple defects in growth and development. *Plant Physiology* 111(3):671-678.
- 476 15. Li J, Nagpal P, Vitart V, McMorris TC, & Chory J (1996) A role for brassinosteroids in light-dependent  
477 development of Arabidopsis. *Science* 272(5260):398-401.
- 478 16. Szekeres M, *et al.* (1996) Brassinosteroids rescue the deficiency of CYP90, a cytochrome P450,  
479 controlling cell elongation and de-etiolation in Arabidopsis. *Cell* 85(2):171-182.
- 480 17. Wang X, *et al.* (2005) Autoregulation and homodimerization are involved in the activation of the  
481 plant steroid receptor BRI1. *Dev Cell* 8(6):855-865.
- 482 18. Wang X & Chory J (2006) Brassinosteroids regulate dissociation of BKI1, a negative regulator of  
483 BRI1 signaling, from the plasma membrane. *Science* 313(5790):1118-1122.
- 484 19. Jaillais Y, *et al.* (2011) Tyrosine phosphorylation controls brassinosteroid receptor activation by  
485 triggering membrane release of its kinase inhibitor. *Genes Dev* 25(3):232-237.
- 486 20. Oh MH, Wang X, Clouse SD, & Huber SC (2012) Deactivation of the Arabidopsis BRASSINOSTEROID  
487 INSENSITIVE 1 (BRI1) receptor kinase by autophosphorylation within the glycine-rich loop. *Proc*  
488 *Natl Acad Sci U S A* 109(1):327-332.
- 489 21. Stone JM, Trotochaud AE, Walker JC, & Clark SE (1998) Control of meristem development by  
490 CLAVATA1 receptor kinase and kinase-associated protein phosphatase interactions. *Plant*  
491 *Physiology* 117(4):1217-1225.

- 492 22. Shah K, Russinova E, Gadella TW, Jr., Willemse J, & De Vries SC (2002) The Arabidopsis kinase-  
493 associated protein phosphatase controls internalization of the somatic embryogenesis receptor  
494 kinase 1. *Genes Dev* 16(13):1707-1720.
- 495 23. Wu G, *et al.* (2011) Methylation of a phosphatase specifies dephosphorylation and degradation of  
496 activated brassinosteroid receptors. *Sci Signal* 4(172):ra29.
- 497 24. Geldner N, Hyman DL, Wang X, Schumacher K, & Chory J (2007) Endosomal signaling of plant  
498 steroid receptor kinase BRI1. *Genes Dev* 21(13):1598-1602.
- 499 25. Martins S, *et al.* (2015) Internalization and vacuolar targeting of the brassinosteroid hormone  
500 receptor BRI1 are regulated by ubiquitination. *Nat Commun* 6:6151.
- 501 26. Zhou J, *et al.* (2018) Regulation of Arabidopsis brassinosteroid receptor BRI1 endocytosis and  
502 degradation by plant U-box PUB12/PUB13-mediated ubiquitination. *Proc Natl Acad Sci U S A*  
503 115(8):E1906-E1915.
- 504 27. Martins S, *et al.* (2017) Brassinosteroid signaling-dependent root responses to prolonged elevated  
505 ambient temperature. *Nat Commun* 8(1):309.
- 506 28. Vierstra RD (2012) The expanding universe of ubiquitin and ubiquitin-like modifiers. *Plant Physiol*  
507 160(1):2-14.
- 508 29. Srivastava AK, *et al.* (2018) SUMO Suppresses the Activity of the Jasmonic Acid Receptor  
509 CORONATINE INSENSITIVE1. *Plant Cell* 30(9):2099-2115.
- 510 30. Orosa B, *et al.* (2018) SUMO conjugation to the pattern recognition receptor FLS2 triggers  
511 intracellular signalling in plant innate immunity. *Nat Commun* 9(1):5185.
- 512 31. Tozluoglu M, Karaca E, Nussinov R, & Haliloglu T (2010) A mechanistic view of the role of E3 in  
513 sumoylation. *PLoS Comput Biol* 6(8).
- 514 32. Srivastava M, *et al.* (2020) SUMO conjugation to BZR1 enables Brassinosteroid signalling to  
515 integrate environmental cues to shape plant growth. *Curr Biol*:xxx-xxx.
- 516 33. Fei Q, *et al.* (2019) Effects of auxin and ethylene on root growth adaptation to different ambient  
517 temperatures in Arabidopsis. *Plant Sci* 281:159-172.
- 518 34. Rakusova H, *et al.* (2016) Termination of Shoot Gravitropic Responses by Auxin Feedback on PIN3  
519 Polarity. *Curr Biol* 26(22):3026-3032.
- 520 35. Robinson DG, Jiang L, & Schumacher K (2008) The endosomal system of plants: charting new and  
521 familiar territories. *Plant Physiol* 147(4):1482-1492.
- 522 36. Di Rubbo S, *et al.* (2013) The clathrin adaptor complex AP-2 mediates endocytosis of  
523 brassinosteroid insensitive1 in Arabidopsis. *Plant Cell* 25(8):2986-2997.
- 524 37. Lu D, *et al.* (2010) A receptor-like cytoplasmic kinase, BIK1, associates with a flagellin receptor  
525 complex to initiate plant innate immunity. *Proc Natl Acad Sci U S A* 107(1):496-501.
- 526 38. Lin W, *et al.* (2013) Inverse modulation of plant immune and brassinosteroid signaling pathways  
527 by the receptor-like cytoplasmic kinase BIK1. *Proc Natl Acad Sci U S A* 110(29):12114-12119.
- 528 39. Belkhadir Y & Jaillais Y (2015) The molecular circuitry of brassinosteroid signaling. *New Phytol.*
- 529 40. Singh M, Gupta A, & Laxmi A (2014) Glucose control of root growth direction in Arabidopsis  
530 thaliana. *J Exp Bot* 65(12):2981-2993.
- 531 41. de Lima CFF, Kleine-Vehn J, De Smet I, & Feraru E (2021) Getting to the Root of Belowground High  
532 Temperature Responses in Plants. *J Exp Bot.*
- 533 42. Fiorucci AS, *et al.* (2020) PHYTOCHROME INTERACTING FACTOR 7 is important for early responses  
534 to elevated temperature in Arabidopsis seedlings. *New Phytol* 226(1):50-58.
- 535 43. Gray WM, Ostin A, Sandberg G, Romano CP, & Estelle M (1998) High temperature promotes auxin-  
536 mediated hypocotyl elongation in Arabidopsis. *Proc Natl Acad Sci U S A* 95(12):7197-7202.
- 537 44. Jung JH, *et al.* (2016) Phytochromes function as thermosensors in Arabidopsis. *Science.*
- 538 45. Koini MA, *et al.* (2009) High temperature-mediated adaptations in plant architecture require the  
539 bHLH transcription factor PIF4. *Curr Biol* 19(5):408-413.

- 540 46. Legris M, *et al.* (2016) Phytochrome B integrates light and temperature signals in Arabidopsis.  
541 *Science*.
- 542 47. Stavang JA, *et al.* (2009) Hormonal regulation of temperature-induced growth in Arabidopsis. *Plant*  
543 *J* 60(4):589-601.
- 544 48. Sun J, Qi L, Li Y, Chu J, & Li C (2012) PIF4-mediated activation of YUCCA8 expression integrates  
545 temperature into the auxin pathway in regulating arabidopsis hypocotyl growth. *PLoS Genet*  
546 8(3):e1002594.
- 547 49. Franklin KA, *et al.* (2011) Phytochrome-interacting factor 4 (PIF4) regulates auxin biosynthesis at  
548 high temperature. *Proc Natl Acad Sci U S A* 108(50):20231-20235.
- 549 50. Chung BYW, *et al.* (2020) An RNA thermoswitch regulates daytime growth in Arabidopsis. *Nature*  
550 *plants* 6(5):522-532.
- 551 51. Gonzalez-Garcia MP, *et al.* (2011) Brassinosteroids control meristem size by promoting cell cycle  
552 progression in Arabidopsis roots. *Development* 138(5):849-859.
- 553 52. Ibanez C, *et al.* (2018) Brassinosteroids Dominate Hormonal Regulation of Plant  
554 Thermomorphogenesis via BZR1. *Curr Biol* 28(2):303-310 e303.
- 555 53. Nemhauser JL, Mockler TC, & Chory J (2004) Interdependency of brassinosteroid and auxin  
556 signaling in Arabidopsis. *PLoS Biol* 2(9):E258.
- 557 54. Kruse M, *et al.* (2009) Impaired endocytosis of the ion channel TRPM4 is associated with human  
558 progressive familial heart block type I. *J Clin Invest* 119(9):2737-2744.
- 559 55. Cuijpers SAG, Willemstein E, & Vertegaal ACO (2017) Converging Small Ubiquitin-like Modifier  
560 (SUMO) and Ubiquitin Signaling: Improved Methodology Identifies Co-modified Target Proteins.  
561 *Mol Cell Proteomics* 16(12):2281-2295.
- 562 56. Chen J & Chen ZJ (2013) Regulation of NF-kappaB by ubiquitination. *Curr Opin Immunol* 25(1):4-  
563 12.
- 564 57. Desterro JM, Rodriguez MS, & Hay RT (1998) SUMO-1 modification of IkappaBalpha inhibits NF-  
565 kappaB activation. *Mol Cell* 2(2):233-239.
- 566 58. Irani NG, *et al.* (2012) Fluorescent castasterone reveals BRI1 signaling from the plasma membrane.  
567 *Nat Chem Biol* 8(6):583-589.
- 568 59. Robatzek S, Chinchilla D, & Boller T (2006) Ligand-induced endocytosis of the pattern recognition  
569 receptor FLS2 in Arabidopsis. *Genes Dev* 20(5):537-542.
- 570 60. Chinchilla D, *et al.* (2007) A flagellin-induced complex of the receptor FLS2 and BAK1 initiates plant  
571 defence. *Nature* 448(7152):497-500.
- 572 61. Heese A, *et al.* (2007) The receptor-like kinase SERK3/BAK1 is a central regulator of innate  
573 immunity in plants. *Proc Natl Acad Sci U S A* 104(29):12217-12222.
- 574 62. Sun Y, *et al.* (2013) Structural basis for flg22-induced activation of the Arabidopsis FLS2-BAK1  
575 immune complex. *Science* 342(6158):624-628.
- 576 63. Schulze B, *et al.* (2010) Rapid heteromerization and phosphorylation of ligand-activated plant  
577 transmembrane receptors and their associated kinase BAK1. *J Biol Chem* 285(13):9444-9451.
- 578 64. Wang X, *et al.* (2008) Sequential transphosphorylation of the BRI1/BAK1 receptor kinase complex  
579 impacts early events in brassinosteroid signaling. *Dev Cell* 15(2):220-235.
- 580 65. Ortiz-Morea FA, He P, Shan L, & Russinova E (2020) It takes two to tango - molecular links between  
581 plant immunity and brassinosteroid signalling. *J Cell Sci* 133(22).
- 582 66. Zhang J, *et al.* (2010) Receptor-like cytoplasmic kinases integrate signaling from multiple plant  
583 immune receptors and are targeted by a Pseudomonas syringae effector. *Cell Host Microbe*  
584 7(4):290-301.
- 585 67. Perraki A, *et al.* (2018) Phosphocode-dependent functional dichotomy of a common co-receptor  
586 in plant signalling. *Nature* 561(7722):248-252.

- 587 68. Karimi M, Depicker A, & Hilson P (2007) Recombinational cloning with plant gateway vectors. *Plant*  
588 *Physiol* 145(4):1144-1154.
- 589 69. Conti L, *et al.* (2008) Small ubiquitin-like modifier proteases OVERLY TOLERANT TO SALT1 and -2  
590 regulate salt stress responses in Arabidopsis. *Plant Cell* 20(10):2894-2908.
- 591 70. Bolte S & Cordelieres FP (2006) A guided tour into subcellular colocalization analysis in light  
592 microscopy. *Journal of microscopy* 224(Pt 3):213-232.

593

594

595 **Figures**

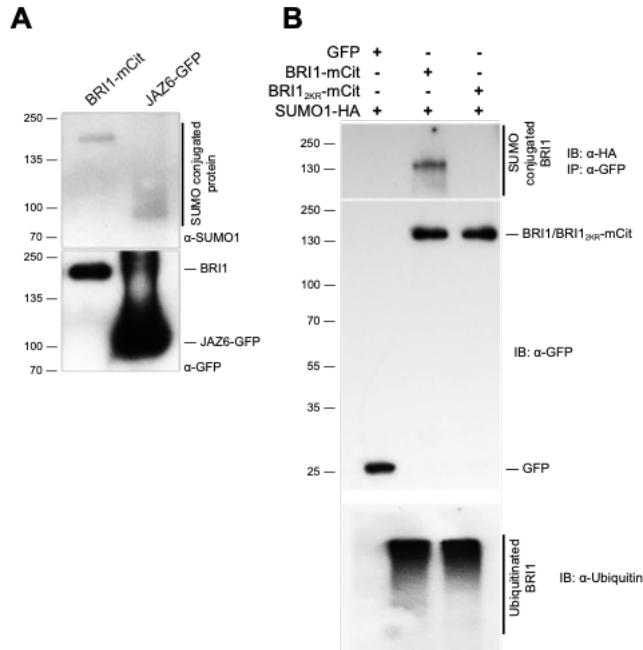

596

597 **Figure 1. BRI1 is SUMOylated in vivo on two intracellular lysine residues.**

598 A. In vivo SUMOylation analyses of BRI1. Immunoprecipitation was carried out using anti-GFP  
599 antibodies on solubilized protein extracts from mono-insertional homozygous BRI1-mCitrine  
600 plants or the JAZ6-GFP positive control plants. Detection of immunoprecipitated proteins used the  
601 anti-GFP (bottom), and anti-SUMO1 (top) antibodies. B. In vivo SUMOylation analyses of BRI1  
602 and BRI1<sub>2KR</sub>. BRI1-mCit and the BRI1<sub>2KR</sub>-mCit variant mutated for residues K1066,1118R were  
603 transiently expressed in *N. benthamiana* leaves prior to immunoprecipitation using anti-GFP  
604 antibodies on solubilized protein extracts. GFP alone was used as negative control. All constructs  
605 were co-expressed with SUMO1-HA. Detection of immunoprecipitated proteins used the anti-GFP  
606 (middle), anti-SUMO1 (top), and anti-ubiquitin (bottom) antibodies.

607

608



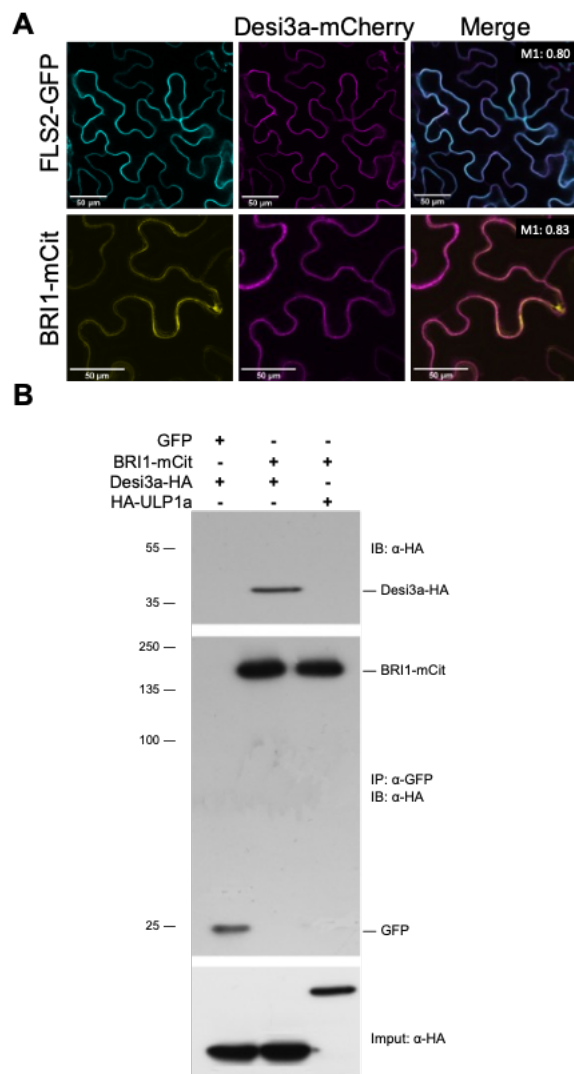

609

610 **Figure 2. BRI1 interacts with the Desi3a SUMO protease in vivo.**

611 A. Confocal microscopy analyses and colocalization analyses between BRI1 and Desi3a. BRI1-  
612 mCit and Desi3a-mcherry (Desi3a-mCh) were transiently expressed in *N. benthamiana* leaves. The  
613 Manders colocalization coefficient are shown in the overlay channel. Scale bars=50 μm. B. In vivo  
614 interaction between BRI1 and Desi3a. BRI1-mCit and Desi3a-HA were transiently expressed in *N.*  
615 *benthamiana* leaves prior to immunoprecipitation using anti-GFP antibodies on solubilized protein  
616 extracts. GFP alone and the ULP1a SUMO protease were used as negative control. Detection of

617 immunoprecipitated proteins used the anti-GFP (middle) and anti-HA (top) antibodies. The input

618 fraction of Desi3a-HA and HA-ULP1a is shown at the bottom.

619

620

621

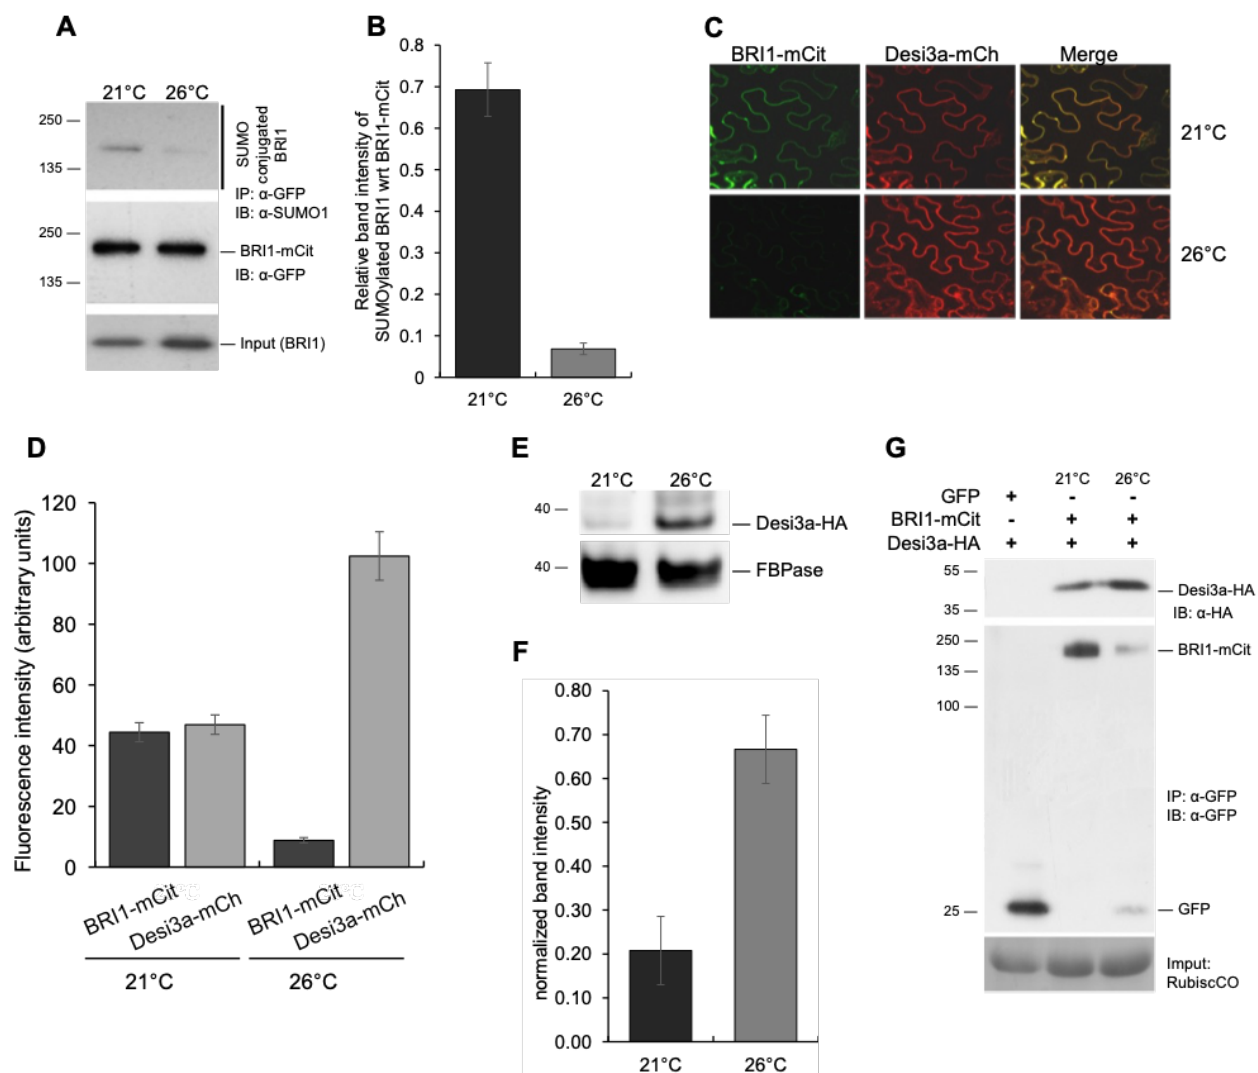

622

623 **Figure 3. Desi3a deSUMOylates BRI1 upon changes in ambient temperature.**

624 A. In vivo SUMOylation analyses of BRI1 at 21°C or 26°C. Immunoprecipitation was carried out

625 using anti-GFP antibodies on solubilized protein extracts from mono-insertional homozygous

626 BRI1-mCitrine plants grown at 21°C or 26°C. Detection of immunoprecipitated proteins used the

627 anti-GFP (middle) and anti-SUMO1 (top) antibodies. The input fraction for BRI1-mCit is shown

628 at the bottom. B. Quantification of BRI1 SUMO at 21°C and 26°C relative to immunoprecipitated

629 BRI1-mCit levels. Error bars represent SEM (n=3). C. Confocal microscopy analyses of BRI1 and

630 Desi3a at 21°C and 26°C. BRI1-mCit and Desi3a-mch were transiently expressed in *N.*

631 *benthamiana* leaves and incubated at 21°C or 26°C for 2 days. Similar confocal detection settings  
632 were used to compare the effect of temperature on BRI1 and Desi3a proteins levels. Several  
633 independent experiments were carried out and multiple regions of interest analyzed to overcome  
634 the variability in transformation efficiency. Scale bars=20 µm. D. Quantification of BRI1 and  
635 Desi3a fluorescence levels in experiments carried out as in C. Multiple regions of interest analyzed  
636 for to overcome the variability in transformation efficiency. Error bars represent SEM (n=15). The  
637 asterisk indicates a statistically significant difference in BRI1-SUMO at 26°C (Mann-Whitney). E.  
638 In vivo interaction between BRI1 and Desi3a at 21°C and 26°C. BRI1-mCit and Desi3a-HA were  
639 transiently expressed in *N. benthamiana* and incubated at 21°C or 26°C for 2 days prior to  
640 immunoprecipitation using anti-GFP antibodies on solubilized protein extracts. GFP alone was  
641 used as negative control. Detection of immunoprecipitated proteins used the anti-GFP (middle) and  
642 anti-HA (top) antibodies. Ponceau staining showing RubisCo accumulation is used as loading  
643 control. F. Western blot analyses monitoring the accumulation of Desi3a-HA protein in plants  
644 grown at 21°C or 26 °C. Detection of Desi3a-HA is performed with anti-HA antibodies. The  
645 membrane was stripped and probed with anti-FBPase antibodies as loading control. G.  
646 Quantification of Desi3a protein at 21°C and 26°C relative to FBPase levels. Error bars represent  
647 SEM (n=3). The asterisk indicates a statistically significant difference in BRI1-SUMO at 26°C  
648 (Mann-Whitney).

649

650

651

652

653

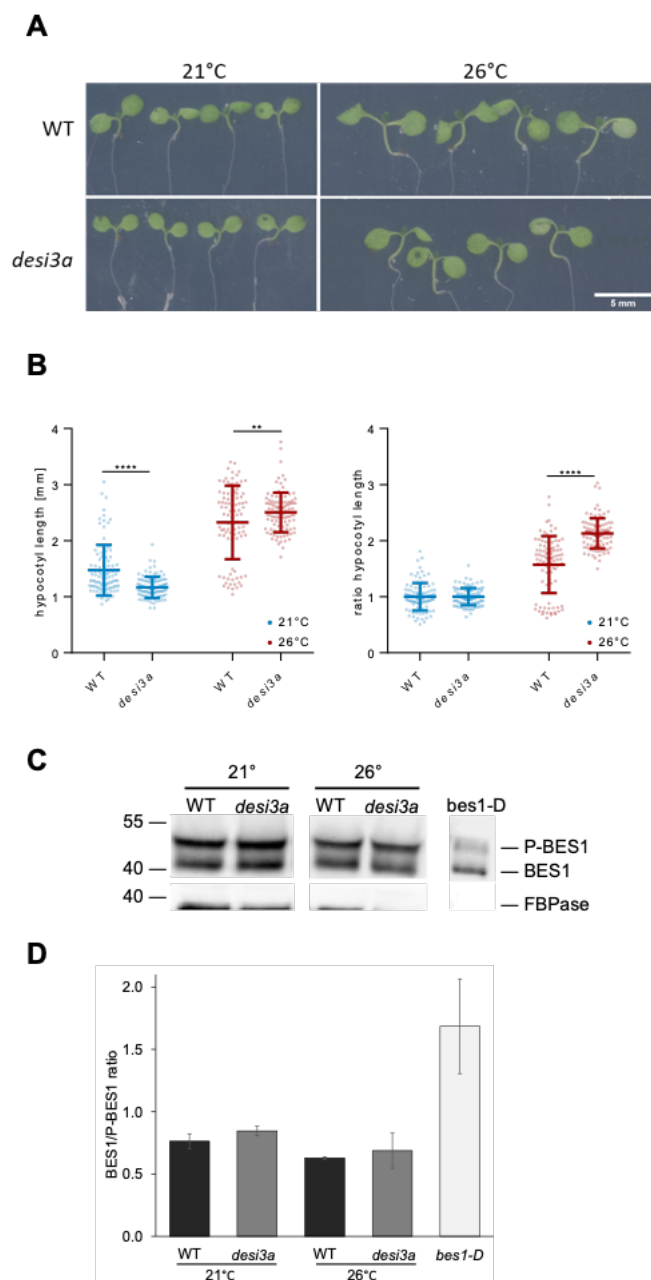

654

655 **Figure 4. *Desi3a* is a negative regulator of plant responses to temperature elevation.**

656 A. Phenotype of 6-day-old wild-type (WT) and *desi3a* mutant plants grown at 21°C or 26°C.

657 Representative pictures are shown. B. Hypocotyl length of 6-day-old wild-type (WT) and *desi3a*

658 mutant plants grown at 21°C or 26 °C. Experiments were carried out in triplicates. Error bars

659 represent SEM (n=20). The asterisk indicates a statistically significant difference between WT and

660 *desi3a* (two-way ANOVA with Sidak's multiple comparison test). C. Ratio of hypocotyl length

661 from wild-type (WT) and *desi3a* mutant plants grown at 21°C and 26 °C for 6 days. Experiments  
662 were carried out in triplicates. Error bars represent SEM (n=20). The asterisk indicates a  
663 statistically significant difference between wild-type and *desi3a* (two-way ANOVA with Sidak's  
664 multiple comparison test). D. Phosphorylation state of the BES1 transcription factor in wild-type  
665 (WT) or *desi3a* plants grown at 21°C or 26 °C. Detection of BES1 is performed with anti-BES1  
666 antibodies. E. Quantification of the ratio between BES1 and phosphorylated BES1 (P-BES1). Error  
667 bars represent SEM (n=2). The asterisk indicates a statistically significant difference in BRI1-  
668 SUMO at 26°C (Mann-Whitney).

669

670

671

672

673

674

675

676

677

678

679

680

681

682

683

684

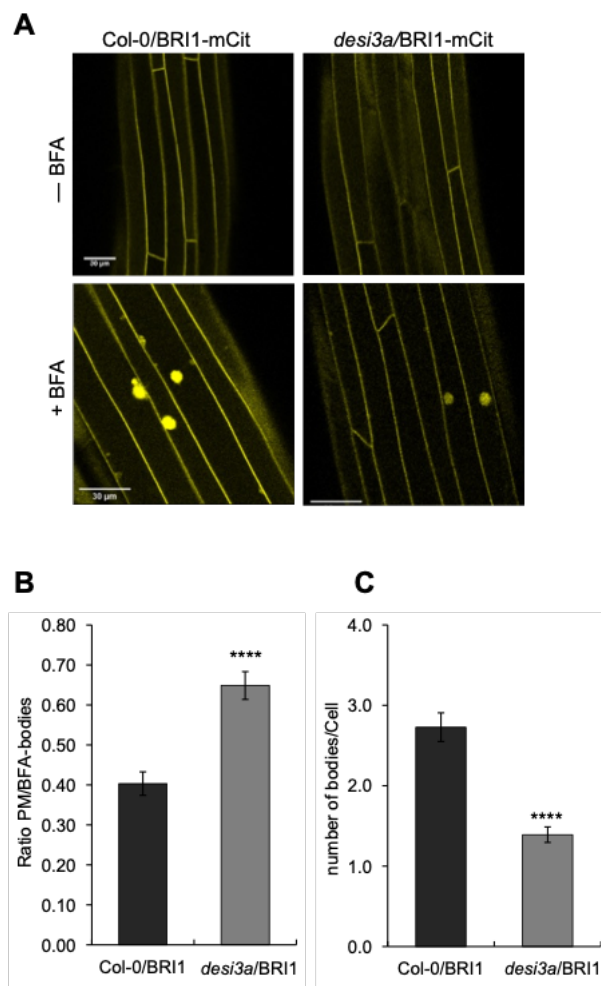

685

686 **Figure 5. Desi3a-dependent deSUMOylation regulates BRI1 endocytosis and interaction with**  
687 **BIK1.**

688 A. Confocal microscopy analyses of BRI1-mCit and *desi3a*/BRI1-mCit dark-grown hypocotyls.  
689 Similar confocal detection settings were used to compare the fluorescence intensity in the two  
690 transgenic lines. Scale bars=30 μm. B. Quantification of the ratio between plasma membrane and  
691 BFA body fluorescence signal intensities of BRI1-mCit and *desi3a*/BRI1-mCit. C. Quantification  
692 of the number of BFA bodies per cell in BRI1-mCit and *desi3a*/BRI1-mCit. Experiments were  
693 carried out in triplicates. Error bars represent SEM (n=9). The asterisk indicates a statistically  
694 significant difference between BRI1-mCit and *desi3a*/BRI1-mCit (Mann-Whitney).

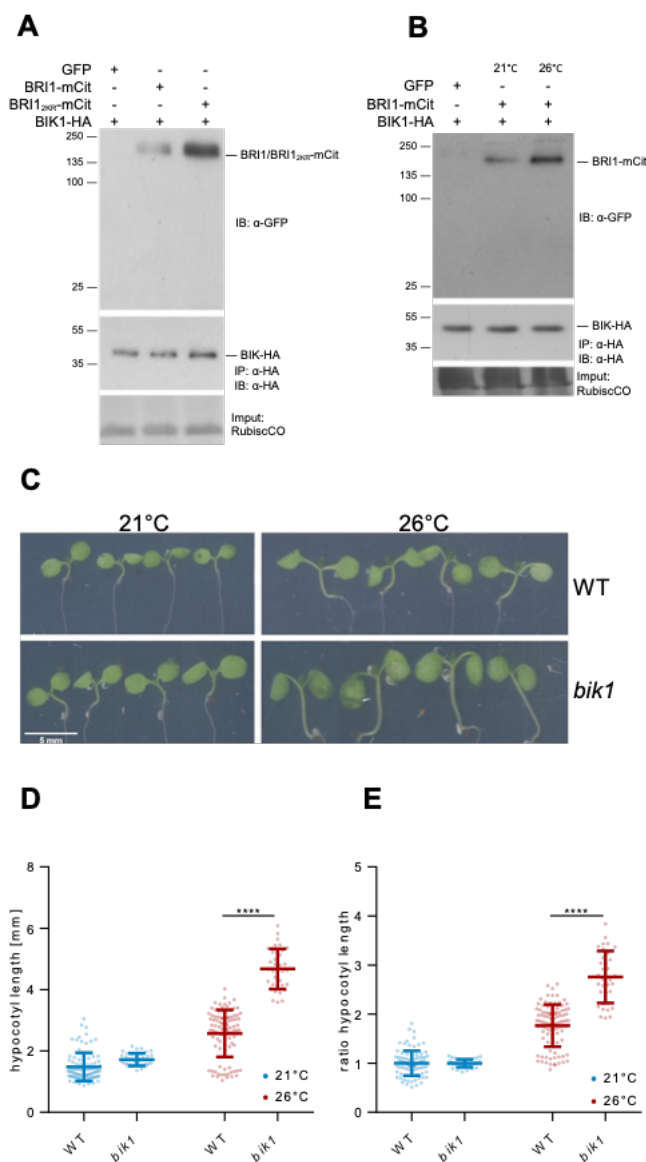

695

696 **Figure 6. Desi3a-dependent deSUMOylation regulates BRI1 interaction with BIK1.**

697 A. In vivo interaction between BIK1 and wild-type BRI1 or BRI1<sub>2KR</sub>. BIK1-HA was coexpressed

698 with BRI1-mCit or BRI1<sub>2KR</sub>-mCit in *N. benthamiana* leaves prior to immunoprecipitation using

699 anti-HA antibodies on solubilized protein extracts. GFP alone was used as negative control.

700 Detection of immunoprecipitated proteins used the anti-HA (middle) and anti-GFP (top)

701 antibodies. Ponceau staining showing Rubisco accumulation is used as loading control. B. In vivo

702 interaction between BIK1 and BRI1 at 21°C or 26°C. BIK1-HA and BRI1-mCit were transiently



703 expressed in *N. benthamiana* and incubated at 21°C or 26°C for 2 days prior to  
704 immunoprecipitation using anti-HA antibodies. GFP alone was used as negative control. Detection  
705 of immunoprecipitated proteins used the anti-HA (middle) and anti-GFP (top) antibodies. Ponceau  
706 staining showing RubisCo accumulation is used as loading control. C. Phenotype of 6-day-old  
707 wild-type (WT) and *bik1* mutant plants grown at 21°C or 26°C. Representative pictures are shown.  
708 D. Hypocotyl length of 6-day-old wild-type (WT) and *bik1* mutant plants grown at 21°C or 26 °C.  
709 Experiments were carried out in triplicates. Error bars represent SEM (n=20). The asterisk indicates  
710 a statistically significant difference between WT and *bik1* (two-way ANOVA with Sidak's multiple  
711 comparison test). E. Ratio of hypocotyl length from wild-type (WT) and *bik1* mutant plants grown  
712 at 21°C and 26 °C for 6 days. Experiments were carried out in triplicates. Error bars represent SEM  
713 (n=20). The asterisk indicates a statistically significant difference between wild-type and *bik1* (two-  
714 way ANOVA with Sidak's multiple comparison test).

715

716

717

718

719

720

721

722

723

724

725

726

**A**

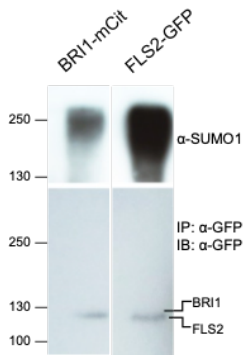

**B**

|        |              |                                                                      |              |
|--------|--------------|----------------------------------------------------------------------|--------------|
| AtBRI1 | <b>K1066</b> | STKGDVYSYGVVLELLLTGKRPTDSPDFGD-NNLVGWVKQHAKLR-ISDVFDPELM <b>KEDP</b> | <b>K1118</b> |
| AtBRL1 | <b>K1044</b> | TAKGDVYSYGVILLELLSGKKPIDPGEFGEDNNLVGWAKQLYREKRGAEILDPELVTD <b>KS</b> | <b>K1100</b> |
| AtBRL3 | <b>K1042</b> | TAKGDVYSYGVILLELLSGKKPIDPEEFGEDNNLVGWAKQLYREKRGAEILDPELVTD <b>KS</b> | <b>K1098</b> |
| OsBRI1 | <b>K990</b>  | TTKGDVYSYGVVLELLLTGKPPDTSADFGEDNNLVGWVKQHTKLK-ITDVFDPELL <b>KEDP</b> | <b>K1043</b> |
| SIBRI1 | <b>K1071</b> | STKGDVYSYGVVLELLLTGKQPTDSADFGD-NNLVGWVKLHAKGK-ITDVFDRELL <b>KEDA</b> | <b>K1123</b> |
|        |              | ::*****:*****:* * * :** :*****.* : : ::::* **::..                    |              |

**C**

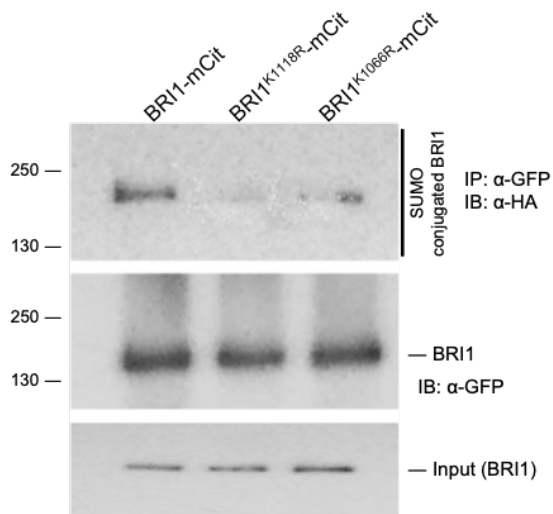

727

728 **Figure S1. BRI1 is SUMOylated in vivo on two intracellular lysine residues.**

729 A. In vivo SUMOylation analyses of BRI1. Immunoprecipitation was carried out using anti-GFP  
 730 antibodies on solubilized protein extracts from mono-insertional homozygous BRI1-mCitrine  
 731 plants or the FLS2-GFP positive control plants. Detection of immunoprecipitated proteins used the  
 732 anti-GFP (bottom), and anti-SUMO1 (top) antibodies. B. Sequence alignment of the cytosolic

733 domain of BRI1 (amino acids 1064-1121) and its homologs BRL1 and BRL3. Predicted SUMO  
734 targets in BRI1 and homologs are shown. BC. In vivo SUMOylation analyses of BRI1, BRI1<sub>K1066R</sub>  
735 and BRI1<sub>K1118R</sub>. BRI1-mCit, BRI1<sub>K1066R</sub>-mCit and BRI1<sub>K1118R</sub>-mCit were transiently expressed in  
736 *N. benthamiana* leaves prior to immunoprecipitation using anti-GFP antibodies on solubilized  
737 protein extracts. All constructs were co-expressed with SUMO1-HA. Detection of  
738 immunoprecipitated proteins used the anti-GFP (middle), anti-SUMO1 (top). The input fraction of  
739 BRI1 prior to immunoprecipitation is shown (bottom).

740

741

742

743

744

745

746

747

748

749

750

751

752

753

754

755

756

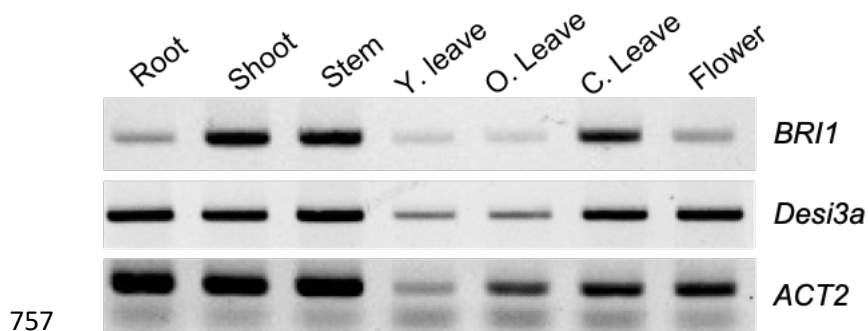

757  
758 **Figure S2. *Desi3a* and *BRI1* expression profiles overlap in plants.**

759 Semi-quantitative RT-PCR analyses of *Desi3a* and *BRI1* mRNA accumulation in different tissues  
760 of wild-type plants.

761

762

763

764

765

766

767

768

769

770

771

772

773

774

775

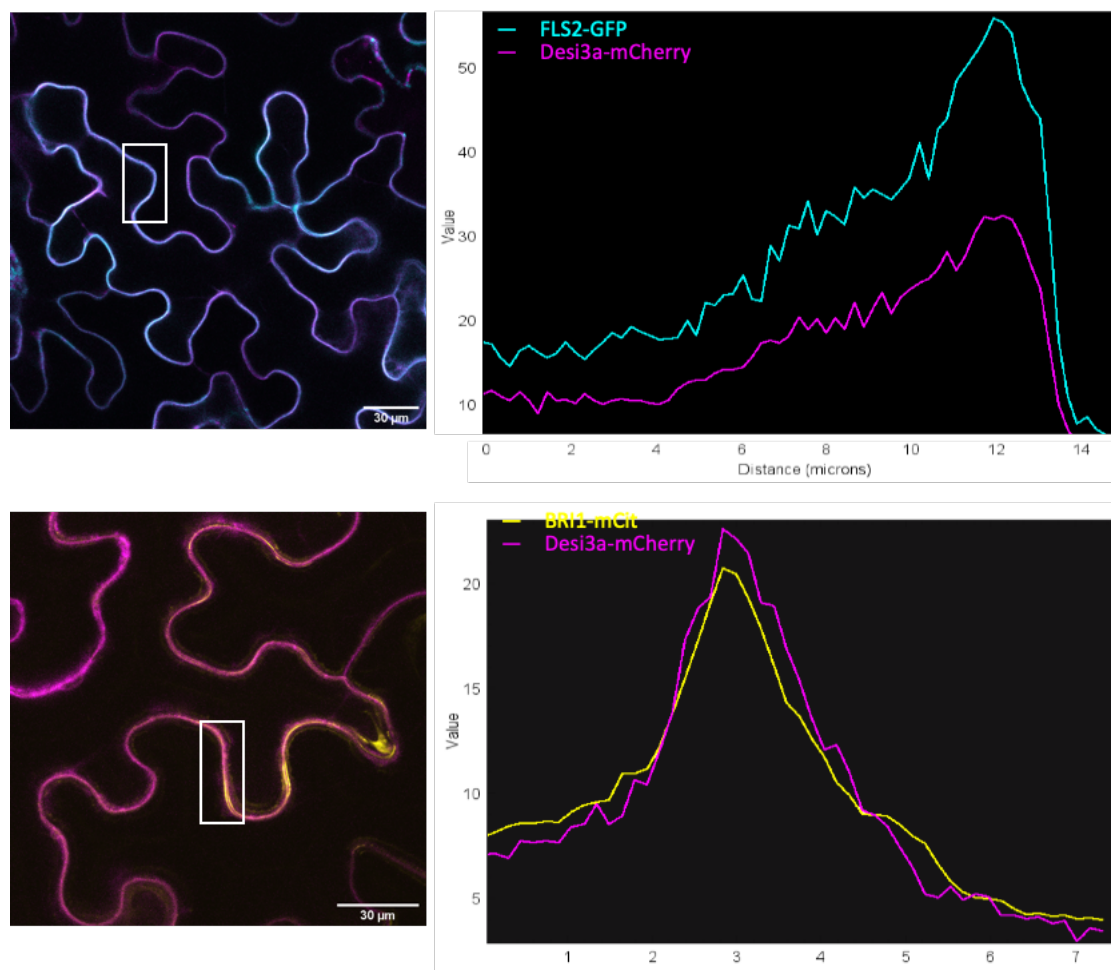

776  
777 **Figure S3. Colocalization of Desi3a with the plasma membrane-localized receptors FLS2 and**  
778 **BRI1.**

779 Fluorescence intensity profile of Desi3a-mCh with FLS2-GFP (top) and BRI1-mCit (bottom). The  
780 region of interest used to monitor fluorescence profiles are shown.

781

782

783

784

785

786

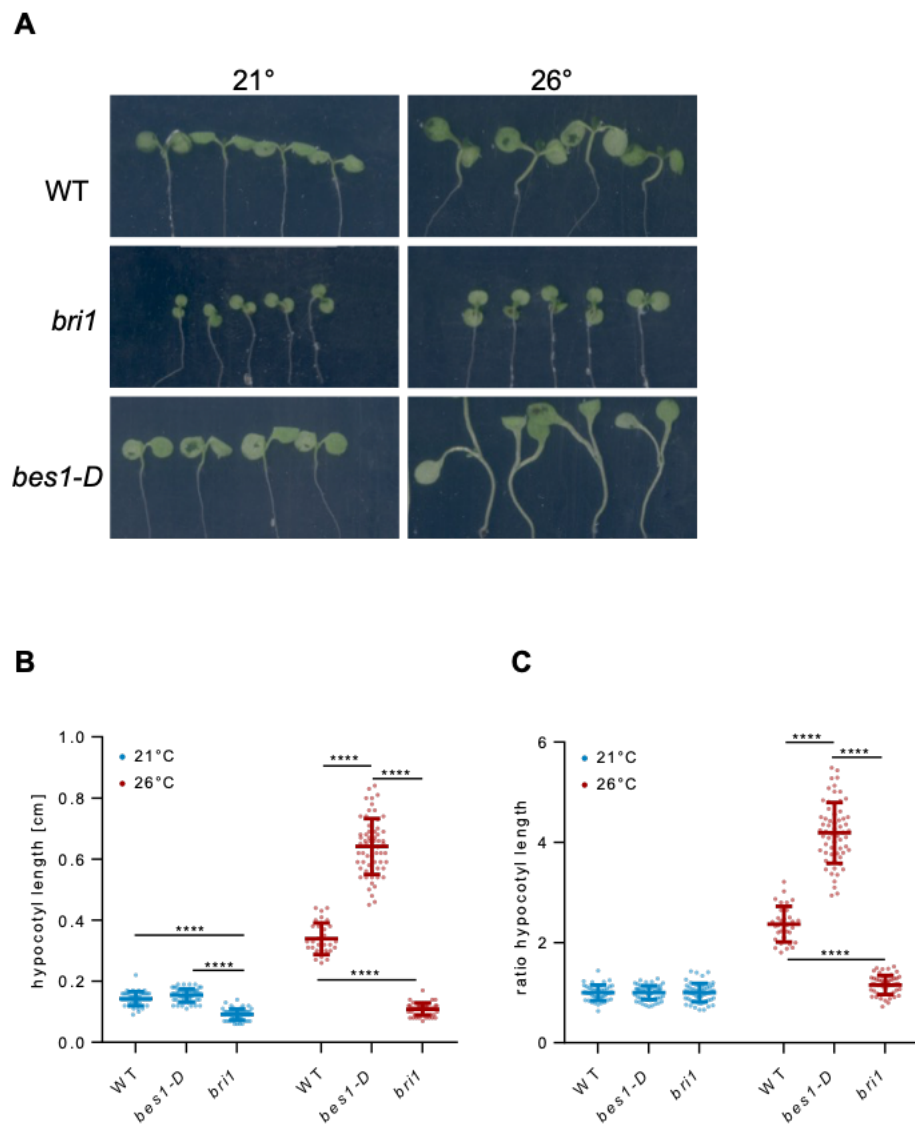

787

788 **Figure S4. Phenotype of BR-related mutants at 21°C and 26°C.**

789 A. Hypocotyl length of 6-day-old wild-type (WT), *bri1* and *bes1-D* mutant plants grown at 21°C  
790 or 26 °C in the dark. Experiments were carried out in triplicates. Error bars represent SEM (n=20).

791 The asterisk indicates a statistically significant difference with wild-type plants (two-way ANOVA  
792 with Sidak's multiple comparison test). B. Ratio of hypocotyl length from wild-type (WT), *bri1*

793 and *bes1-D* mutant plants grown at 21°C and 26 °C for 6 days. Experiments were carried out in

794 triplicates. Error bars represent SEM (n=20). The asterisk indicates a statistically significant  
795 difference with wild-type (two-way ANOVA with Sidak's multiple comparison test).

796

797

798

799

800

801

802

803

804

805

806

807

808

809

810

811

812

813

814

815

816

817

818

819

820

821

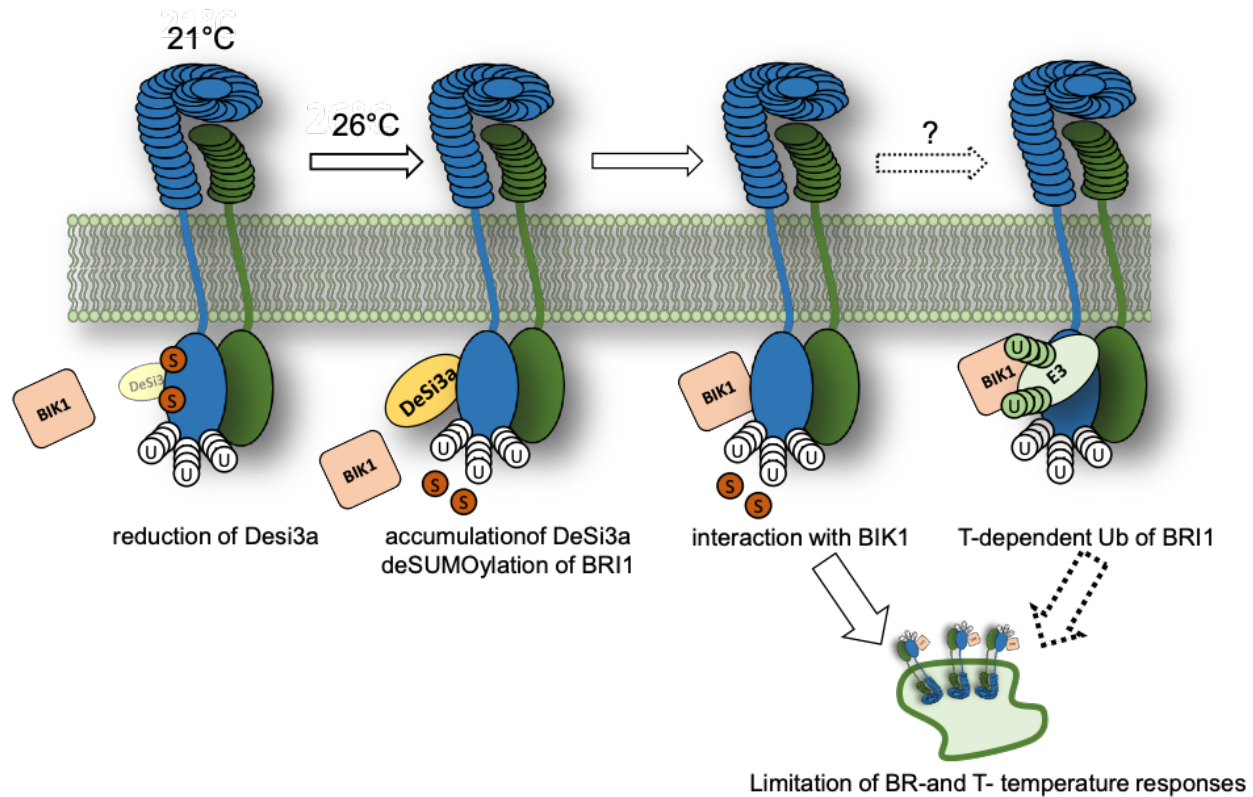

822

823 **Figure S5. Model for the regulation by BRI1 by SUMO/deSUMOylation.**

824 Under standard temperature growth conditions (21°C), BRI1 is SUMOylated at residues K1066  
825 and K1118 explained, at least in part, by the low levels of the Desi3a SUMO protease. Upon  
826 exposure to higher temperature (26°C), Desi3a accumulates and leads to the deSUMOylation of  
827 BRI1. DeSUMOylated BRI1 is downregulated through i) stronger interaction with the BIK1  
828 negative regulator of BR signaling, and ii) increased ubiquitin-mediated endocytosis presumably  
829 through further ubiquitination of BRI1 at residues K1066 and K1118. This in turn limits the growth  
830 responses of hypocotyls to temperature elevation. Consequently, loss-of-function mutants for  
831 *desi3a* or *bik1* show enhanced responses to heightened temperature. BRI1 SUMO/deSUMOylation  
832 therefore acts as a temperature dependent switch that modulates BR-dependent responses and  
833 growth.

834



835 **Table S1.** Primers used in this study

836

| <b>Name</b>   | <b>Sequence</b>                    | <b>Purpose</b> |
|---------------|------------------------------------|----------------|
| BRI1-K1066R-F | GGTGTTCAACAAGAGGAGACGTTTATAGTTACGG | SDM            |
| BRI1-K1066R-R | CCGTAACTATAAACGTCTCCTCTTGTTGAACACC | SDM            |
| BRI1 K1118R F | CGAGCTTATGAGGGAAGATCCAG            | SDM            |
| BRI1 K1118R R | CTGGATCTTCCCTCATAAGCTCG            | SDM            |
| DESI3a_qPCR_F | CATACTTCCCGAGTCCCTCA               | RT-PCR         |
| DESI3a_qPCR_R | AGTTGCCAAGGAGGTAAGCA               | RT-PCR         |
| BRI1 RT-PCR F | TCCGCGGTGTGATCCTTCAAAT             | RT-PCR         |
| BRI1 RT-PCR R | GCCGTGTGGACCAGTTTAGTTT             | RT-PCR         |
| ACT2 F        | GCCCAGAAGTCTTGTTCCAG               | RT-PCR         |
| ACT2 R        | TCATACTCGGCCTTGGAGAT               | RT-PCR         |

837
